# Supplementary material
Source: publisher figshare collection journal article supplement (https://acs.figshare.com/ndownloader/files/5732184)
Supplement: Supplementary file 1 [file 5732184]

## Support Information

# Ultrafine Nb<sub>2</sub>O<sub>5</sub> Nanocrystal Coating on Reduced Graphene Oxide as Anode Material for High Performance Sodium Ion Battery

Litao Yan,<sup>†</sup> Gen Chen,<sup>†</sup> Swagotom Sarker,<sup>†</sup> Stephanie Richins,<sup>†</sup> Huiqiang Wang,<sup>†,‡</sup> Weichuan Xu,<sup>†</sup> Xianhong Rui,<sup>\*,§</sup> Hongmei Luo<sup>\*†</sup>

<sup>†</sup>Department of Chemical and Materials Engineering, New Mexico State University, New Mexico 88003, United States.

<sup>‡</sup>College of Mechanical and Electrical Engineering, Agricultural University of Hebei, Baoding 071001, China.

<sup>§</sup>School of Energy and Environment, Anhui University of Technology, Maanshan 243002, China.

### Corresponding Author

\* Tel: 18555558965, E-mail: [xhrui@outlook.com](mailto:xhrui@outlook.com) (X. Rui); Tel: 575-646-4204, Fax: 575-646-7706. E-mail: [hluo@nmsu.edu](mailto:hluo@nmsu.edu) (H. Luo)

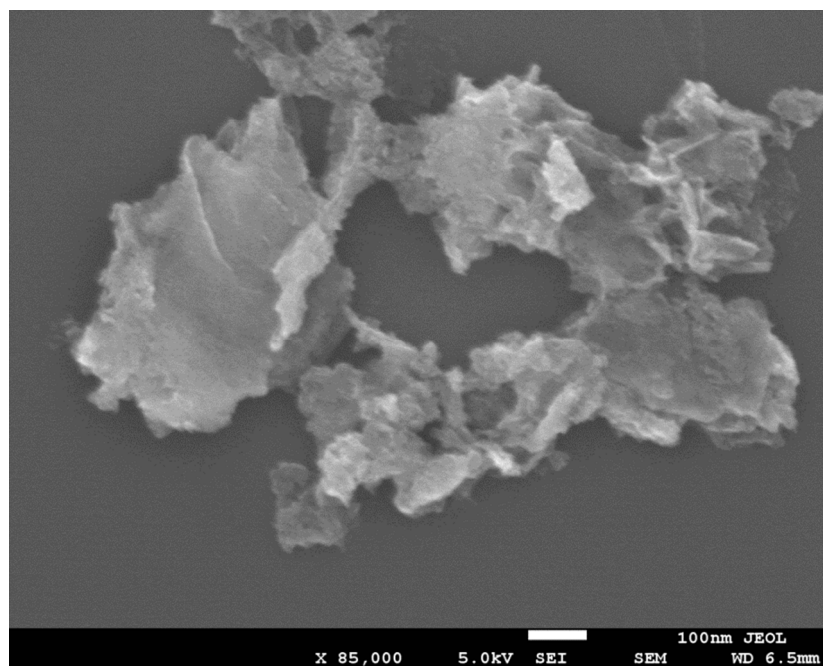

**Figure S1.** FESEM of Nb<sub>2</sub>O<sub>5</sub> NCs/rGO.

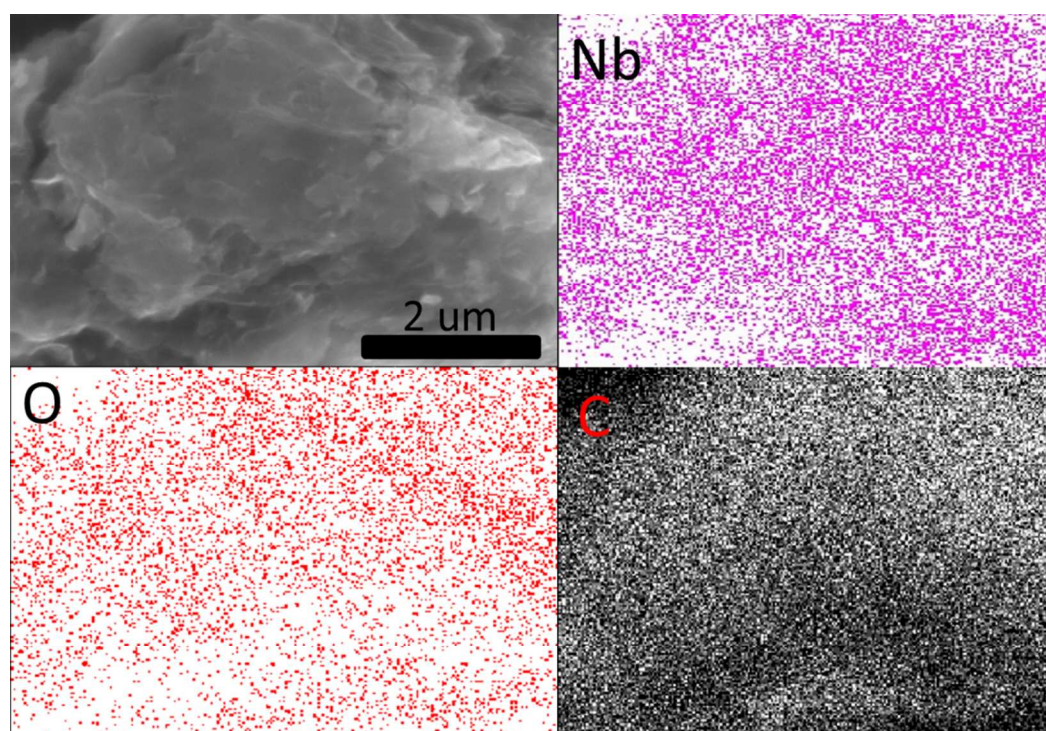

**Figure S2.** SEM-EDX mapping for Nb<sub>2</sub>O<sub>5</sub> NCs/rGO.

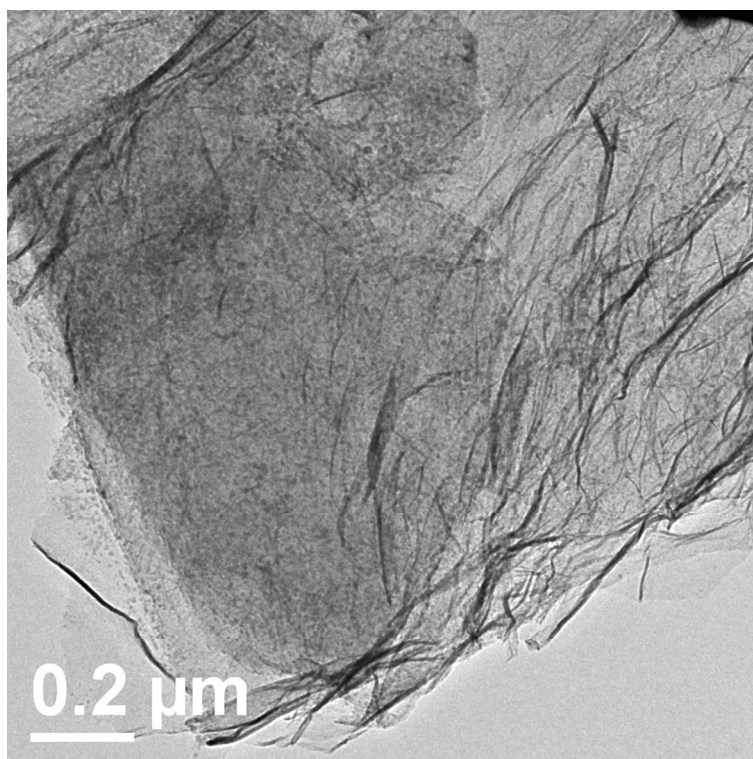

**Figure S3.** TEM image of Nb<sub>2</sub>O<sub>5</sub> NCs/rGO at low magnification.

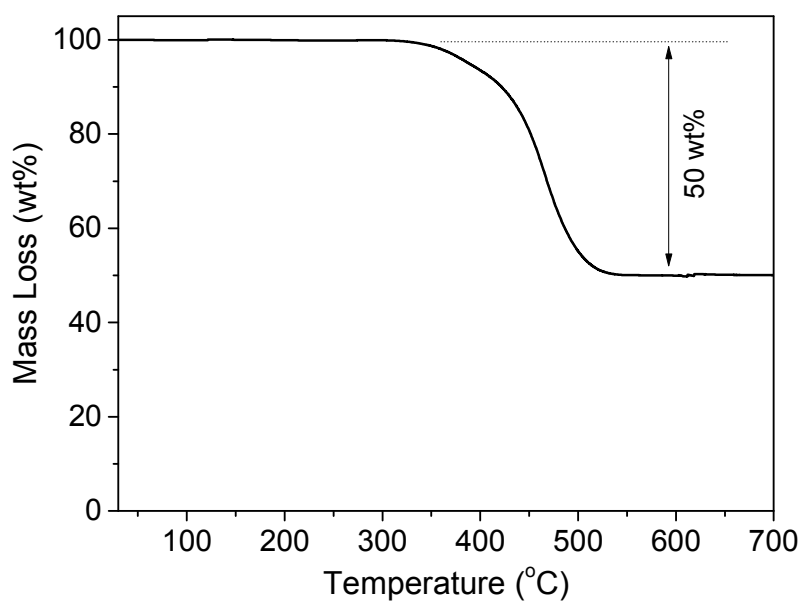

**Figure S4.** Thermogravimetric analysis (TGA) of Nb<sub>2</sub>O<sub>5</sub> NCs/rGO.

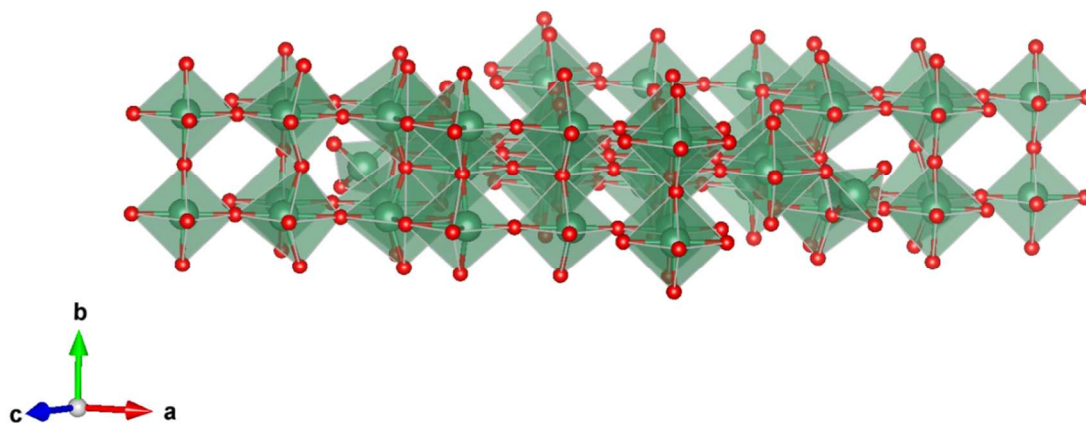

**Figure S5.** 3D structural scheme of  $T\text{-Nb}_2\text{O}_5$ .  $T\text{-Nb}_2\text{O}_5$  octahedra are stacked along the  $c$ -axis and the layered arrangement of niobium (green) and oxygen (red) atoms is formed within the  $a$ - $b$  plane.

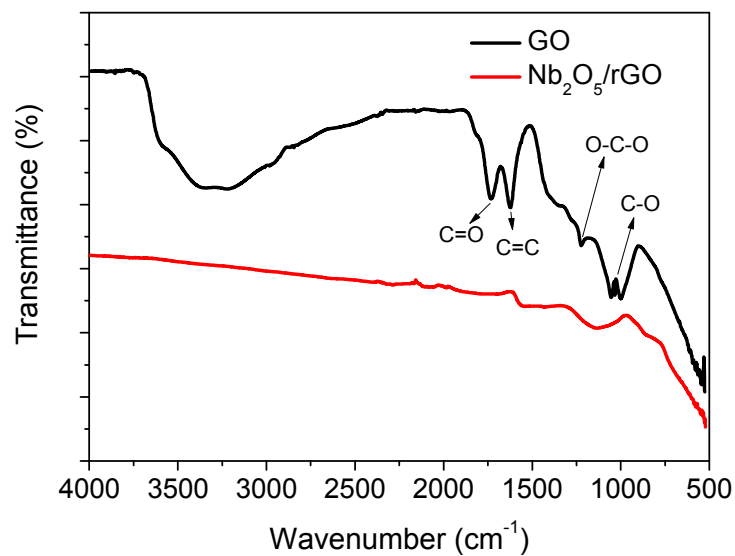

**Figure S6.** FTIR of GO and  $\text{Nb}_2\text{O}_5$  NCs/rGO.

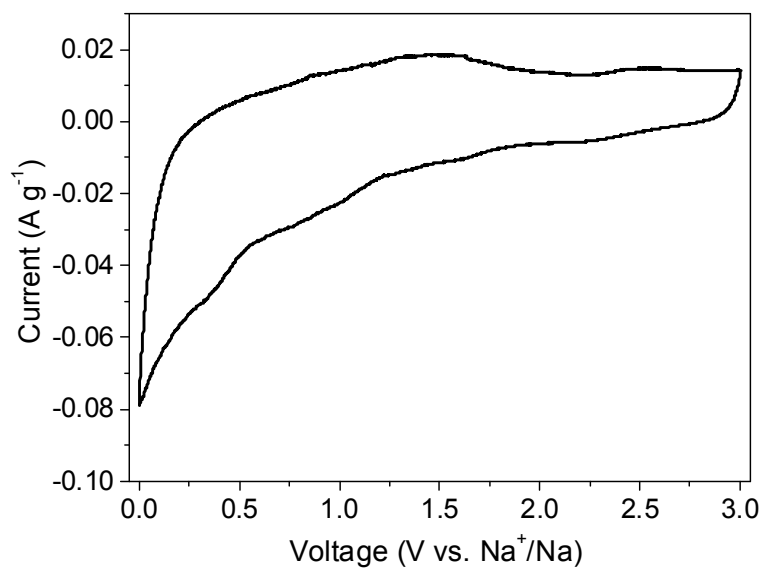

**Figure S7.** The typical CV profile for the pure Nb<sub>2</sub>O<sub>5</sub>.

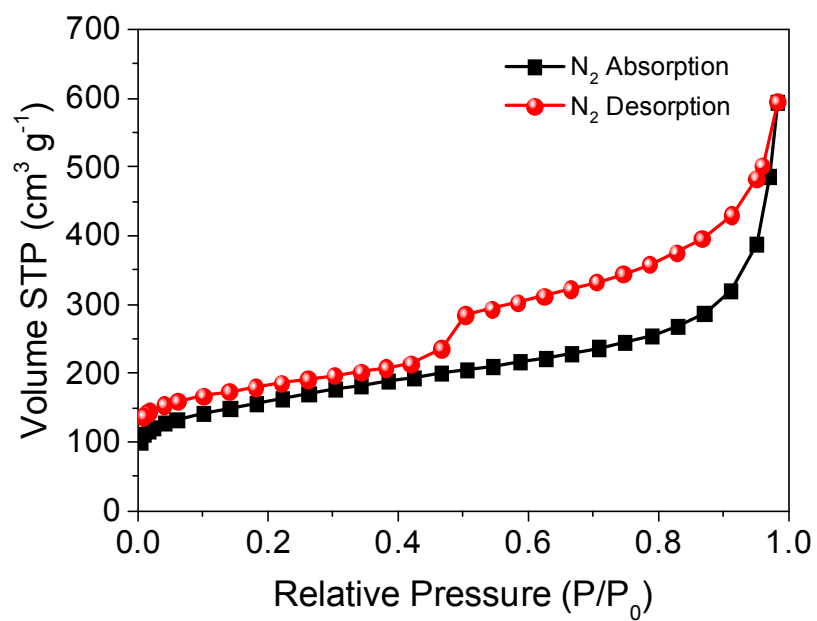

**Figure S8.** Nitrogen adsorption/desorption profile for Nb<sub>2</sub>O<sub>5</sub> NCs/rGO.

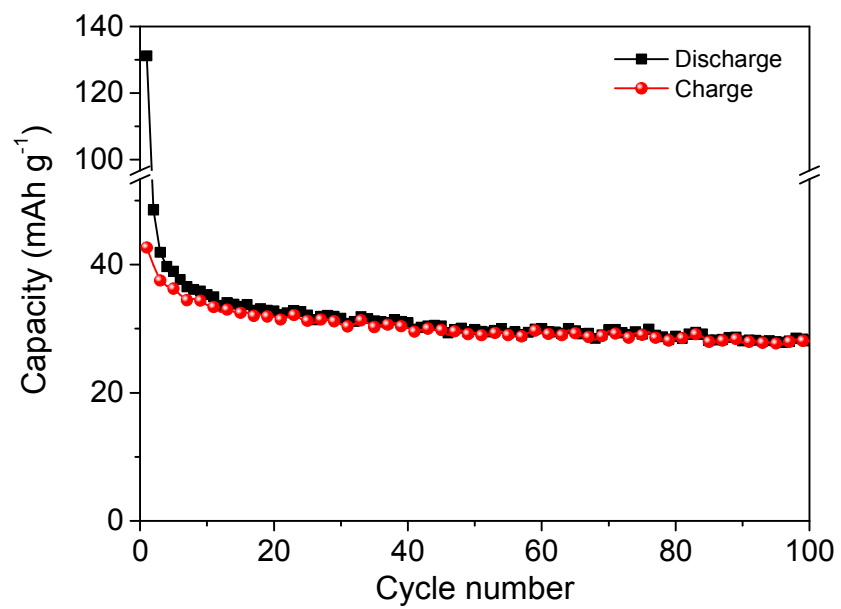

**Figure S9.** The capacity of rGO at a current density of  $0.2 \text{ A g}^{-1}$ .

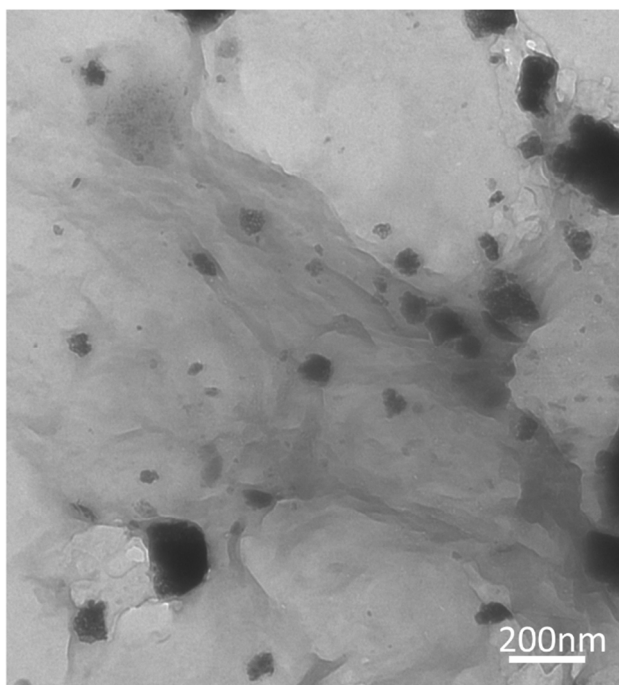

**Figure S10.** TEM image of mechanically mixed  $\text{Nb}_2\text{O}_5$  and rGO.



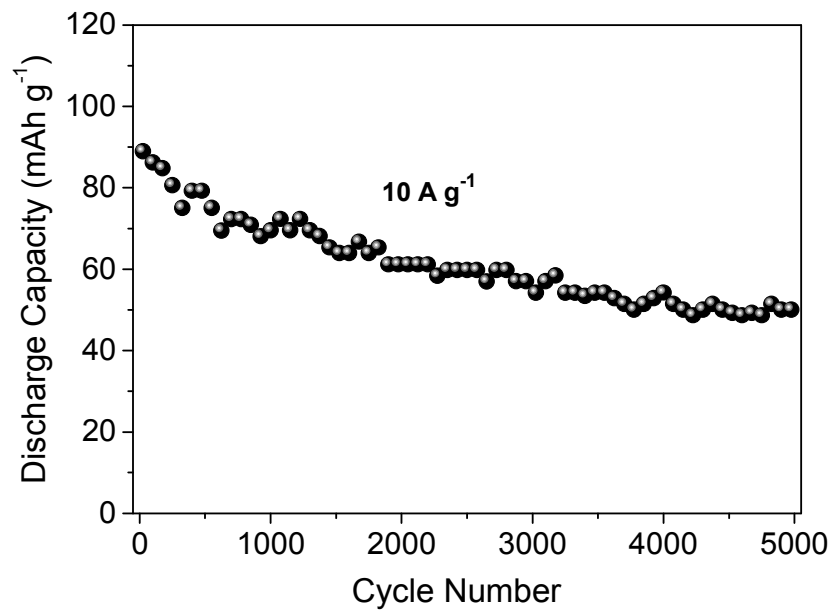

**Figure S11.** Cycle performance of Nb<sub>2</sub>O<sub>5</sub> NCs/rGO at a current density of 10 A g<sup>-1</sup>.

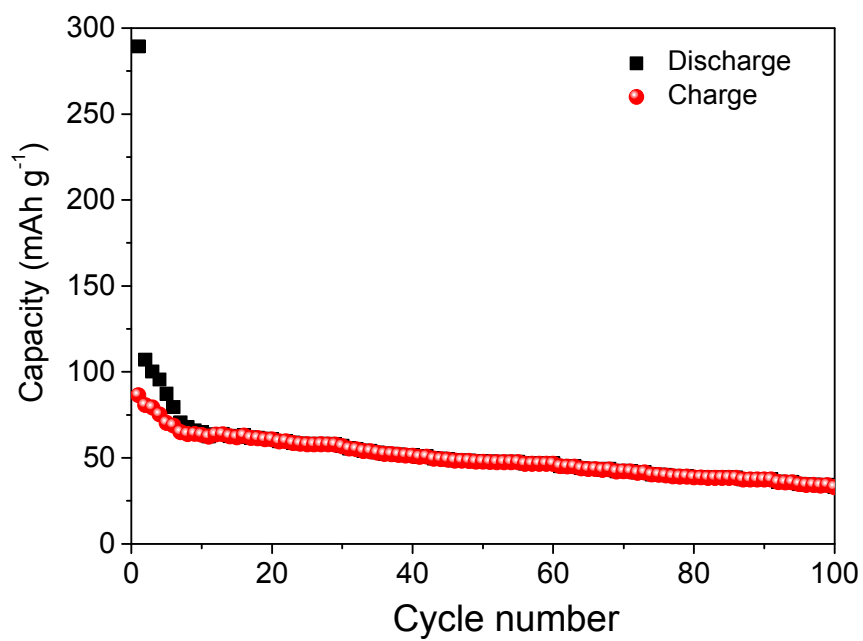

**Figure S12.** The cycling stability of the mechanically mixed Nb<sub>2</sub>O<sub>5</sub> and rGO.
